# Supplementary material
Source: PubMed Central journal article supplement (PMC6054889)
Supplement: NIHMS972271-supplement.pdf [file NIHMS972271-supplement.pdf]

**Appendix**  
**Cervical Cancer Incidence in Young U.S. Females After Human Papillomavirus Vaccine Introduction**  
**Guo et al.**

**Appendix Table 1.** Number of Cases of Invasive Cervical Cancer Among Women Aged 15–34 Years, USCS 2001–2014

| Variable                | Number of cases |        |
|-------------------------|-----------------|--------|
| Age (years)             | 15–24           | 25–34  |
| All                     | 2,227           | 23,200 |
| Time period             |                 |        |
| 2001–2006               | 1,056           | 10,498 |
| 2007–2014               | 1,171           | 12,702 |
| Race/Ethnicity          |                 |        |
| Hispanics               | 447             | 4,607  |
| Non-Hispanic whites     | 1,292           | 14,433 |
| Non-Hispanic blacks     | 353             | 2,869  |
| Asian/Pacific Islanders | 42              | 624    |
| Histology               |                 |        |
| SCC                     | 1,334           | 15,395 |
| Non-SCC                 | 893             | 7,805  |

*Notes:* Data were from U.S. Cancer Statistics (USCS), the combined data from the Centers for Disease Control and Prevention (CDC’s) National Program for Cancer Registries (NPCR) and the National Cancer Institute’s (NCI’s) Surveillance, Epidemiology, and End Results (SEER) Program.

SCC, squamous cell carcinoma.

**Appendix Table 2.** Effective Guidelines During the Study Period (2001–2014) From USPSTF, ACS, and ACOG

| Year              | Recommendation                                                                                                                                                                                                                                                                                                                                                                                                                                                                                                                                                               |
|-------------------|------------------------------------------------------------------------------------------------------------------------------------------------------------------------------------------------------------------------------------------------------------------------------------------------------------------------------------------------------------------------------------------------------------------------------------------------------------------------------------------------------------------------------------------------------------------------------|
| <b>USPSTF</b>     |                                                                                                                                                                                                                                                                                                                                                                                                                                                                                                                                                                              |
| 1996 <sup>1</sup> | <ul style="list-style-type: none"> <li>• Regular Pap tests are recommended for all women who are or have been sexually active and who have a cervix.</li> <li>• Testing should begin at the age when the woman first engages in sexual intercourse.</li> <li>• Pap tests should be performed at least every 3 years.</li> </ul>                                                                                                                                                                                                                                              |
| 2002 <sup>2</sup> | <ul style="list-style-type: none"> <li>• Strongly recommends screening for cervical cancer in women who have been sexually active and have a cervix.</li> <li>• Beginning screening within 3 years of onset of sexual activity or age 21 (whichever comes first) and screening at least every 3 years.</li> <li>• Insufficient to recommend for or against the routine use of liquid-based cytology or HPV testing as alternatives or adjuncts to cytology screening.</li> </ul>                                                                                             |
| 2010 <sup>3</sup> | <ul style="list-style-type: none"> <li>• Strongly recommends screening for cervical cancer in women who have been sexually active and have a cervix.</li> <li>• Screening can safely be delayed until 3 years after onset of sexual activity or until age 21, whichever comes first.</li> <li>• Screening every 3 years.</li> </ul>                                                                                                                                                                                                                                          |
| 2012 <sup>4</sup> | <ul style="list-style-type: none"> <li>• Recommend against screening earlier than age 21 years.</li> <li>• Screening women ages 21 to 65 years every 3 years with liquid-based or conventional cytology.</li> <li>• Start to recommend liquid-based cytology.</li> <li>• HPV testing combined with cytology (co-testing) every 5 years in women ages 30 to 65 years.</li> </ul>                                                                                                                                                                                              |
| 2014 <sup>5</sup> | <ul style="list-style-type: none"> <li>• Same as 2012.</li> </ul>                                                                                                                                                                                                                                                                                                                                                                                                                                                                                                            |
| <b>ACS</b>        |                                                                                                                                                                                                                                                                                                                                                                                                                                                                                                                                                                              |
| 1987 <sup>6</sup> | <ul style="list-style-type: none"> <li>• Annual Pap test for all women who are or have been sexually active, or have reached the age of 18.</li> <li>• After a woman has had three or more consecutive, technically satisfactory, normal annual examinations, the Pap test may be performed less frequently at the discretion of her physician.</li> </ul>                                                                                                                                                                                                                   |
| 2002 <sup>7</sup> | <ul style="list-style-type: none"> <li>• Beginning screening approximately 3 years after the onset of vaginal intercourse or age 21.</li> <li>• Annually with conventional cervical cytology smears OR every 2 years using liquid-based cytology.</li> <li>• After age 30, women who have had three consecutive, technically satisfactory normal/negative cytology results may be screened every 2 to 3 years.</li> <li>• Every 3 years using conventional or liquid-based cytology combined with HPV DNA test (if FDA approved the test for cervical screening).</li> </ul> |
| 2012 <sup>8</sup> | <ul style="list-style-type: none"> <li>• No screening in women aged &lt;21 years.</li> <li>• Aged 21–29 years: cytology alone every 3 years.</li> <li>• Aged 30–65 years: HPV and cytology “cotesting” every 5 years (preferred), cytology alone every 3 years (acceptable).</li> </ul>                                                                                                                                                                                                                                                                                      |

**Appendix**  
**Cervical Cancer Incidence in Young U.S. Females After Human Papillomavirus Vaccine Introduction**  
**Guo et al.**

---

ACOG

- 1995<sup>9</sup>
  - Annual Pap test for all women who are or have been sexually active, or have reached the age of 18.
  - After a woman has had three or more consecutive, satisfactory annual examinations with normal findings, the Pap test may be performed less frequently at the discretion of her physician.
- 2003<sup>10</sup>
  - Beginning screening approximately 3 years after the onset of sexual intercourse, but no later than age 21 years.
  - Annual screening for women <30 years old. Women ≥30 years old who have had three consecutive negative cytology results may be screened every 2 to 3 years.
  - Liquid-based and conventional methods of cervical cytology both acceptable.
- 2009<sup>11</sup>
  - Cervical cancer screening should begin at age 21 regardless of age at onset of sexual activity.
  - Cervical cytology screening from age 21 to 29 is recommended every 2 years. Women ≥30 years old who have had three consecutive negative cytology results may extend the interval between cervical cytology examinations to every 3 years.
  - Co-testing using the combination of cytology plus HPV DNA testing is an appropriate screening test for women ≥30 years old with a screening interval no sooner than 3 years.
- 2012<sup>12</sup>
  - Cervical cancer screening should begin at age 21 regardless of age at onset of sexual activity.
  - Cervical cytology screening from age 21 to 29 is recommended every 3 years.
  - Aged 30–65 years: HPV and cytology “cotesting” every 5 years (preferred), cytology alone every 3 years (acceptable).

---

ACOG, American College of Obstetricians and Gynecologists; ACS, American Cancer Society; USPSTF, U.S. Preventive Services Task Force; HPV, human papillomavirus; FDA, U.S. Food and Drug Administration.

## REFERENCES

1. U.S. Preventive Services Task Force. The Guide to Clinical Preventive Services, 1996. [www.ncbi.nlm.nih.gov/books/NBK15435/](http://www.ncbi.nlm.nih.gov/books/NBK15435/). Accessed April 25, 2017.
2. U.S. Preventive Services Task Force. The Guide to Clinical Preventive Services, 2002. [www.ncbi.nlm.nih.gov/books/NBK15199/](http://www.ncbi.nlm.nih.gov/books/NBK15199/). Accessed April 25, 2017.
3. U.S. Preventive Services Task Force. The Guide to Clinical Preventive Services, 2010–2011. [www.ncbi.nlm.nih.gov/books/NBK56707/](http://www.ncbi.nlm.nih.gov/books/NBK56707/). Accessed April 25, 2017.
4. U.S. Preventive Services Task Force. The Guide to Clinical Preventive Services, 2012. [www.ncbi.nlm.nih.gov/books/NBK115115/](http://www.ncbi.nlm.nih.gov/books/NBK115115/). Accessed April 25, 2017.
5. U.S. Preventive Services Task Force. The Guide to Clinical Preventive Services, 2014. [www.ncbi.nlm.nih.gov/books/NBK235846/](http://www.ncbi.nlm.nih.gov/books/NBK235846/). Accessed April 25, 2017.
6. Fink DJ. Change in American Cancer Society Checkup Guidelines for detection of cervical cancer. *CA Cancer J Clin*. 1988;38(2):127–128. <https://doi.org/10.3322/canjclin.38.2.127>.
7. Saslow D, Runowicz CD, Solomon D, et al. American Cancer Society guideline for the early detection of cervical neoplasia and cancer. *CA Cancer J Clin*. 2002;52(6):342–362. <https://doi.org/10.3322/canjclin.52.6.342>.
8. Saslow D, Solomon D, Lawson HW, et al. American Cancer Society, American Society for Colposcopy and Cervical Pathology, and American Society for Clinical Pathology screening guidelines for the prevention and early detection of cervical cancer. *CA Cancer J Clin*. 2012;62(3):147–172. <https://doi.org/10.3322/caac.21139>.
9. ACOG committee opinion. Recommendations on frequency of Pap test screening. Number 152--March 1995. Committee on Gynecologic Practice. American College of Obstetricians and Gynecologists. *Int J Gynaecol Obstet*. 1995;49(2):210–211. [https://doi.org/10.1016/0020-7292\(95\)90306-2](https://doi.org/10.1016/0020-7292(95)90306-2).
10. ACOG Committee on Practice Bulletins. ACOG Practice Bulletin: clinical management guidelines for obstetrician-gynecologists. Number 45, August 2003. Cervical cytology screening (replaces committee opinion 152, March 1995). *Obstet Gynecol*. 2003;102(2):417–427.
11. ACOG Committee on Practice Bulletins—Gynecology. ACOG Practice Bulletin no. 109: Cervical cytology screening. *Obstet Gynecol*. 2009;114(6):1409–1420. <https://doi.org/10.1097/AOG.0b013e3181c6f8a4>.
12. ACOG Committee on Practice Bulletins—Gynecology. ACOG Practice Bulletin Number 131: Screening for cervical cancer. *Obstet Gynecol*. 2012;120(5):1222–1238.

**Appendix Figure 1.** HPV vaccine coverage among girls aged 13–17 years, National Immunization Survey (NIS) – Teen 2008–2014. Proportion: girls who received at least one dose of HPV vaccine.

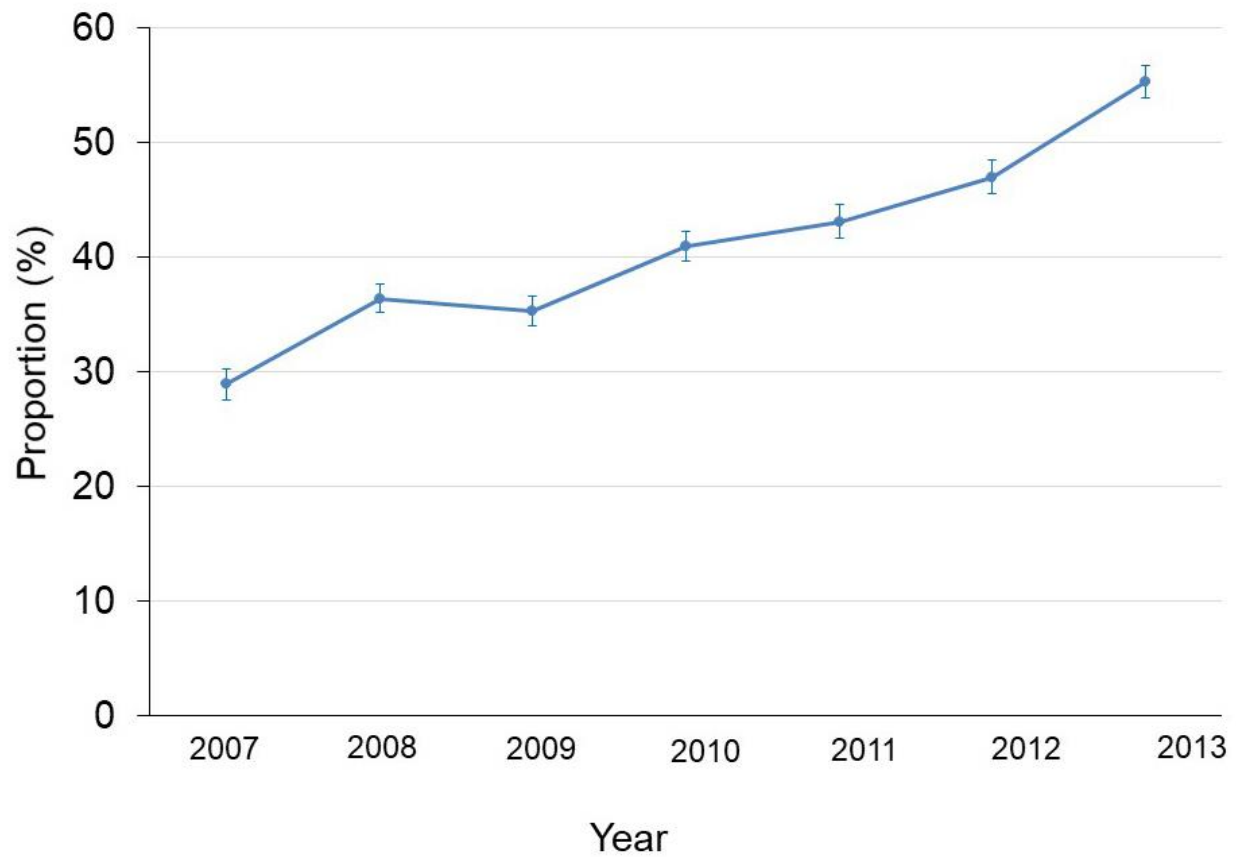

HPV, human papillomavirus.

**Appendix Figure 2.** HPV vaccine coverage among females aged 18–24 or 25–34 years, National Health Interview Survey (NHIS) 2008–2015. Proportion: girls who received at least one dose of HPV vaccine.

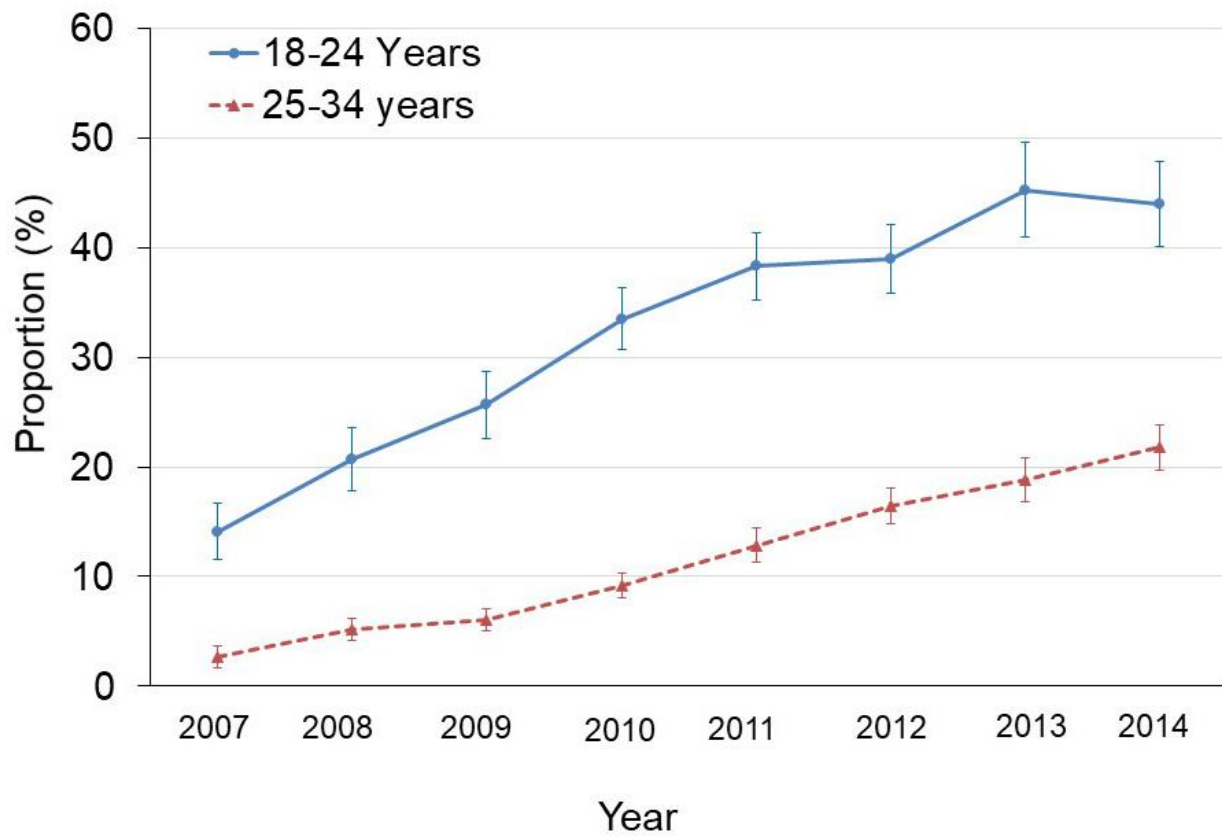

HPV, human papillomavirus.

**Appendix Figure 3.** Prevalence of high-risk vaccine type HPV (16 and 18) among females 18–24 or 25–34 years old, National Health and Nutrition Examination Survey (NHANES) 2003–2014. HPV prevalence was estimated using test results of HPV DNA from vaginal swabs.

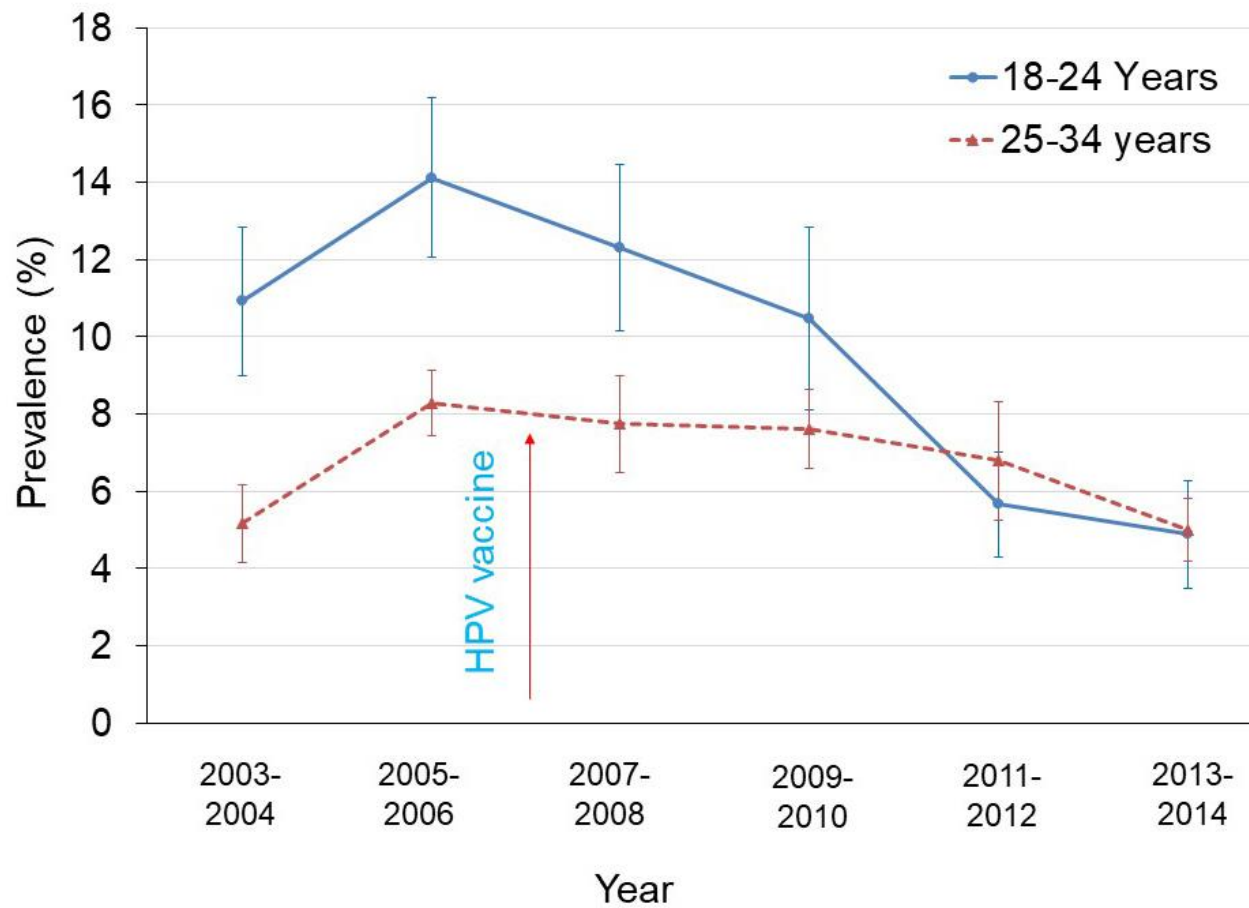

HPV, human papillomavirus.
